# Supplementary material for: Effect of tighter glycemic control on cardiac function, exercise capacity, and muscle strength in heart failure patients with type 2 diabetes: a randomized study
Source: PubMed Central journal article supplement — BMJ Open Diabetes Res Care. 2016 Apr 29;4(1):e000202. doi: 10.1136/bmjdrc-2016-000202 (PMC4853801; doi:10.1136/bmjdrc-2016-000202), 2016-04-29
Supplement: bmjdrc-2016-000202supp.pdf [file bmjdrc-2016-000202supp.pdf]

Supplement data

Table 1

|                            | No optimisation (n=19) |                     | Optimisation (n=20) |                      | p-value* |
|----------------------------|------------------------|---------------------|---------------------|----------------------|----------|
|                            | Baseline               | Follow-up           | Baseline            | Follow-up            |          |
| <b>Diuretic treatment</b>  |                        |                     |                     |                      |          |
| Furosemide dosage (mg/day) | 100±68                 | 104±72              | 102±70              | 108±77               | 0.71     |
| <b>Blood samples</b>       |                        |                     |                     |                      |          |
| NEFA (mmol/L)              | 0.49<br>[0.28-0.64]    | 0.51<br>[0.32-0.54] | 0.47<br>[0.22-0.61] | 0.33†<br>[0.20-0.41] | 0.14     |
| Glucagon (pg/ml)           | 88±36                  | 91±30               | 111±53              | 102±41†              | 0.04     |
| Creatinine (µmol/L)        | 96±27                  | 96±25               | 100±25              | 99±24                | 0.97     |
| C-peptide (pmol/L)         | 417<br>[188-776]       | 480<br>[241-732]    | 424<br>[278-827]    | 352<br>[122-726]     | 0.17     |
| IGF-1 (ng/ml)              | 98±26                  | 112±29              | 115±30              | 112±34               | 0.10     |
| Cortisol (nmol/L)          | 436±171                | 499±154             | 502±189             | 525±228              | 0.50     |
| Metanephrine (pg/ml)       | 29<br>[18-37]          | 19<br>[9-36]        | 43<br>[14-55]       | 31<br>[7-75]         | 0.14     |
| NT-pro-BNP (pg/ml)         | 349<br>[141-712]       | 307<br>[191-698]    | 541<br>[340-1284]   | 595<br>[233-1389]    | 0.94     |
| <b>Questionnaire</b>       |                        |                     |                     |                      |          |
| SF-12 score                | 32 [29-33]             | 31 [31-32]          | 32 [29-33]          | 32 [30-33]           | 0.66     |

Supplement data table 1: Results are presented as mean±SD or median [25-75% percentile]. There was no differences (p>0.05) in baseline values between the groups.

\*p-values refer to difference in delta values between the groups and are based on a repeated measurement mixed-effect linear model.

†Indicates significant difference (p<0.05) as compared with baseline.

Table 2

|                                    | No optimization (n=19) |           | Optimization (n=20) |           | p-value * |
|------------------------------------|------------------------|-----------|---------------------|-----------|-----------|
|                                    | Baseline               | Follow-up | Baseline            | Follow-up |           |
| <b>Echo. (rest)</b>                |                        |           |                     |           |           |
| LVEF (%)                           | 37±12                  | 38±10     | 33±11               | 34±12     | 0.97      |
| Strain (%)                         | -11.0±3.2              | -10.7±2.5 | -9.8±2.4            | -10.0±2.9 | 0.42      |
| S'max (cm/s)                       | 4.0±0.8                | 4.1±0.8   | 4.0±1.16            | 3.7±1.1   | 0.04      |
| WMS                                | 1.20±0.35              | 1.18±0.32 | 1.05±0.27           | 1.07±0.33 | 0.57      |
| E/A-ratio                          | 0.86±0.29              | 0.95±0.33 | 0.95±0.33           | 1.04±0.45 | 0.26      |
| E/é                                | 17.3±7.2               | 18.5±7.1  | 21.4±12.1           | 21.9±9.4  | 0.13      |
| <b>Echo. (peak dob.)</b>           |                        |           |                     |           |           |
| LVEF (%)                           | 47±15                  | 49±14     | 43±12               | 44±14     | 0.96      |
| Strain (%)                         | -12.4±4.0              | -13.2±4.0 | -11.2±2.7           | -11.6±3.8 | 0.54      |
| S'max (cm/s)                       | 7.2±2.6                | 7.4±2.6   | 6.0±2.1             | 6.1±2.2   | 0.77      |
| WMS                                | 1.61±0.54              | 1.67±0.50 | 1.39±0.34           | 1.37±0.39 | 0.41      |
| <b>Echo. (contractile reserve)</b> |                        |           |                     |           |           |
| LVEF (%)                           | 12±7                   | 12±7      | 10±7                | 10±8      | 0.88      |
| Strain (%)                         | -1.6±2.2               | -2.4±2.3  | -1.7±1.6            | -1.8±1.5  | 0.23      |
| S'max (cm/s)                       | 3.2±2.1                | 3.3±2.2   | 2.0±1.2             | 2.3±1.4   | 0.50      |
| WMS                                | 0.41±0.26              | 0.51±0.29 | 0.36±0.22           | 0.34±0.18 | 0.25      |
| <b>BP and HR (rest)</b>            |                        |           |                     |           |           |
| Systolic BP (mmHg)                 | 121±15                 | 121±18    | 124±18†             | 124±24    | 0.97      |
| Diastolic BP (mmHg)                | 66±7                   | 67±11     | 71±9†               | 66±11     | 0.11      |
| HR (bpm)                           | 69±14                  | 70±13     | 72±17†              | 68±15     | 0.17      |
| <b>BP and HR (peak)</b>            |                        |           |                     |           |           |
| Systolic BP (mmHg)                 | 158±22                 | 151±25    | 161±30              | 166±21    | 0.17      |
| Diastolic BP (mmHg)                | 77±11                  | 77±12     | 76±12               | 76±11     | 0.98      |
| HR (bpm)                           | 83±31                  | 92±28     | 85±28               | 82±23     | 0.15      |

Supplement data table 2: Echocardiographic and hemodynamic findings

Results in each group at baseline and follow-up are presented as mean±SD.

\*p-values refer to difference in delta values between the groups and are based on a repeated measurement mixed-effect linear model.

†Indicates significant difference ( $p < 0.05$ ) at baseline between groups.

LVEF: Left ventricular ejections fraction; WMS: Wall motion score; BP: Blood pressure; HR:

Heart rate
